# Supplementary material
Source: PubMed Central journal article supplement (PMC4902620)
Supplement: supp_pp.16.00372_PP2016-00372DR1_Figure_S1.pdf [file supp_pp.16.00372_PP2016-00372DR1_Figure_S1.pdf]

Supplemental Figure S1

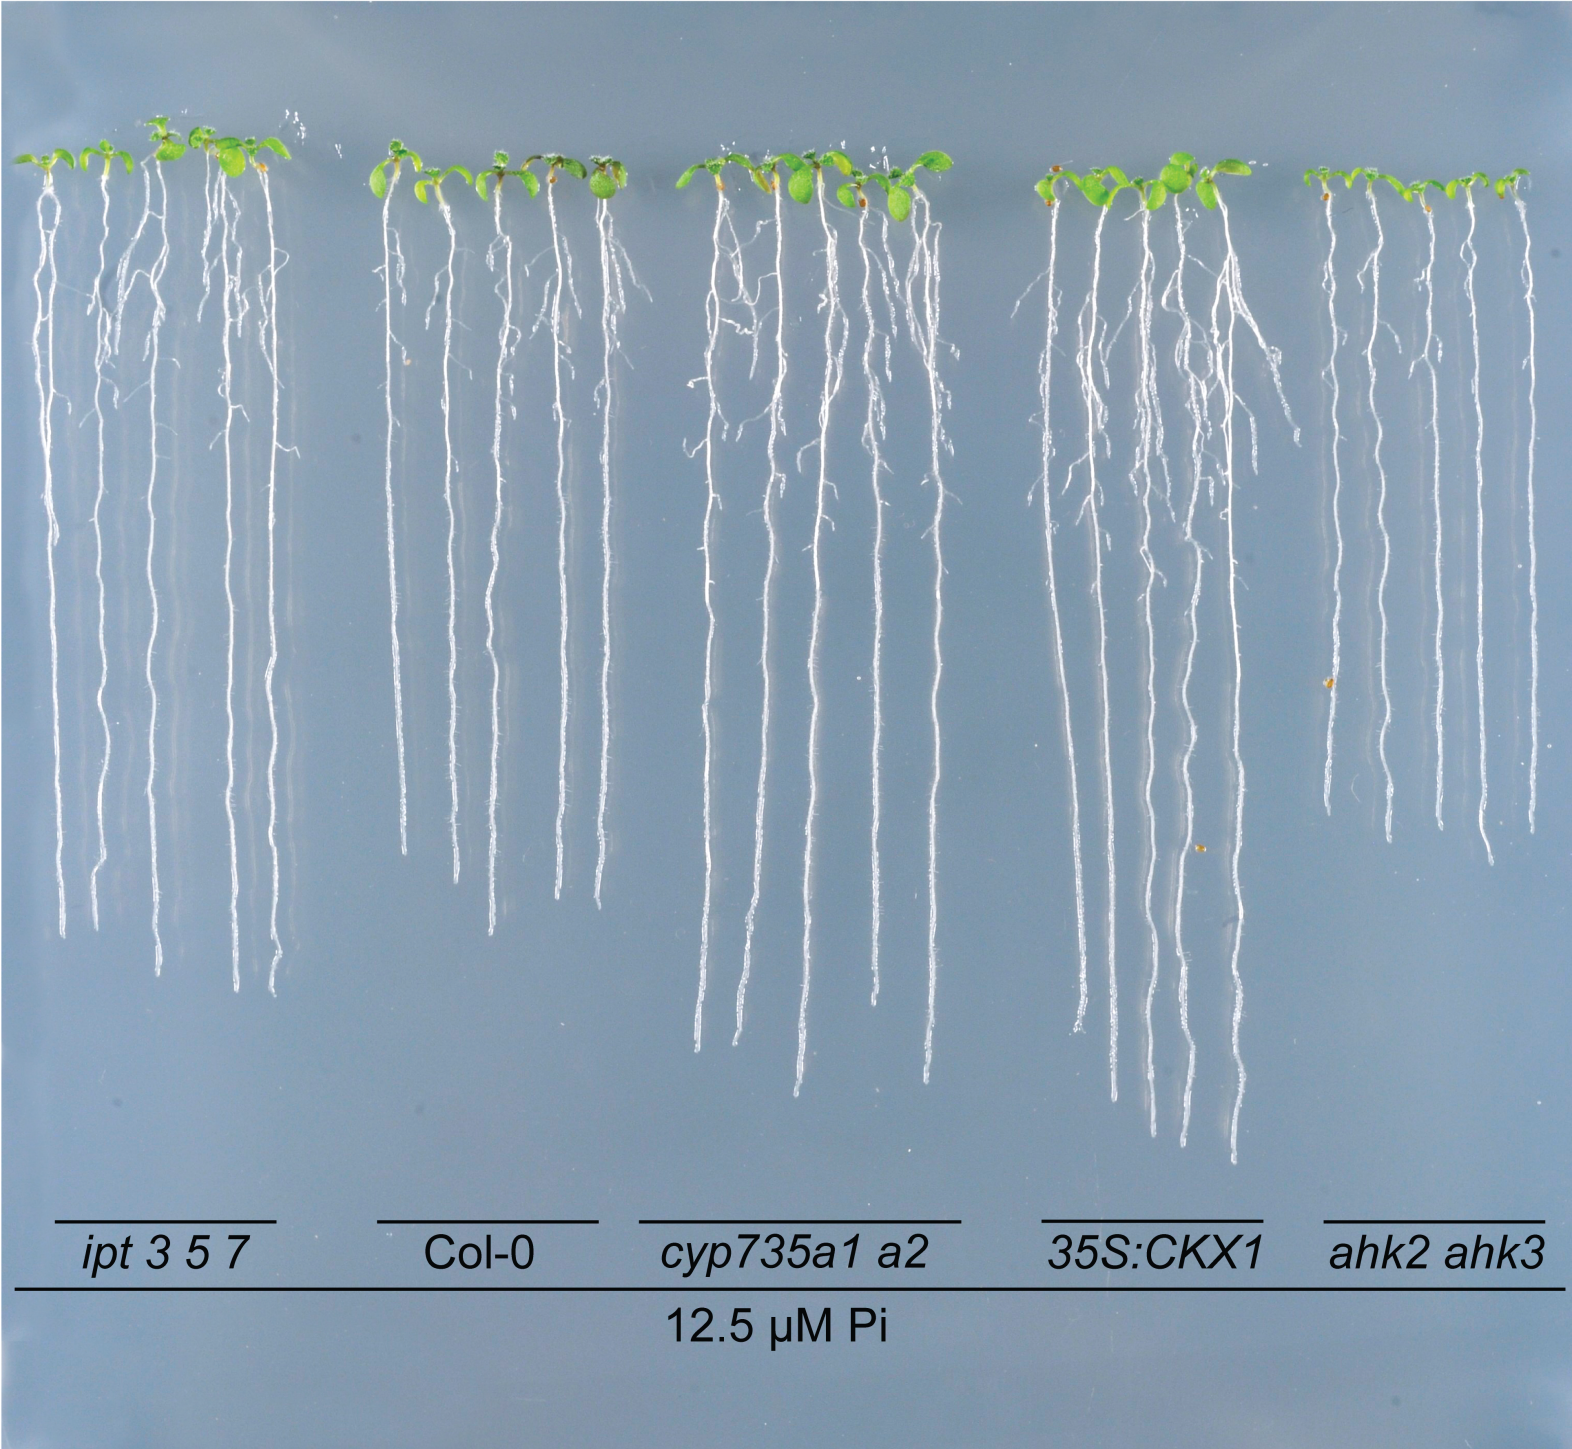

**Supplemental Figure S1.** Phenotypes of *ipt 3 5 7*, wild-type (Col-0), *cyp735a1 a2*, *35S:CKX1* and *ahk2 ahk3* plants grown on 12.5 μM Pi for 10 days.
