# Supplementary material
Source: PubMed Central journal article supplement (PMC4902620)
Supplement: supp_pp.16.00372_PP2016-00372DR1_Figure_S2.pdf [file supp_pp.16.00372_PP2016-00372DR1_Figure_S2.pdf]

## Supplemental Figure S2

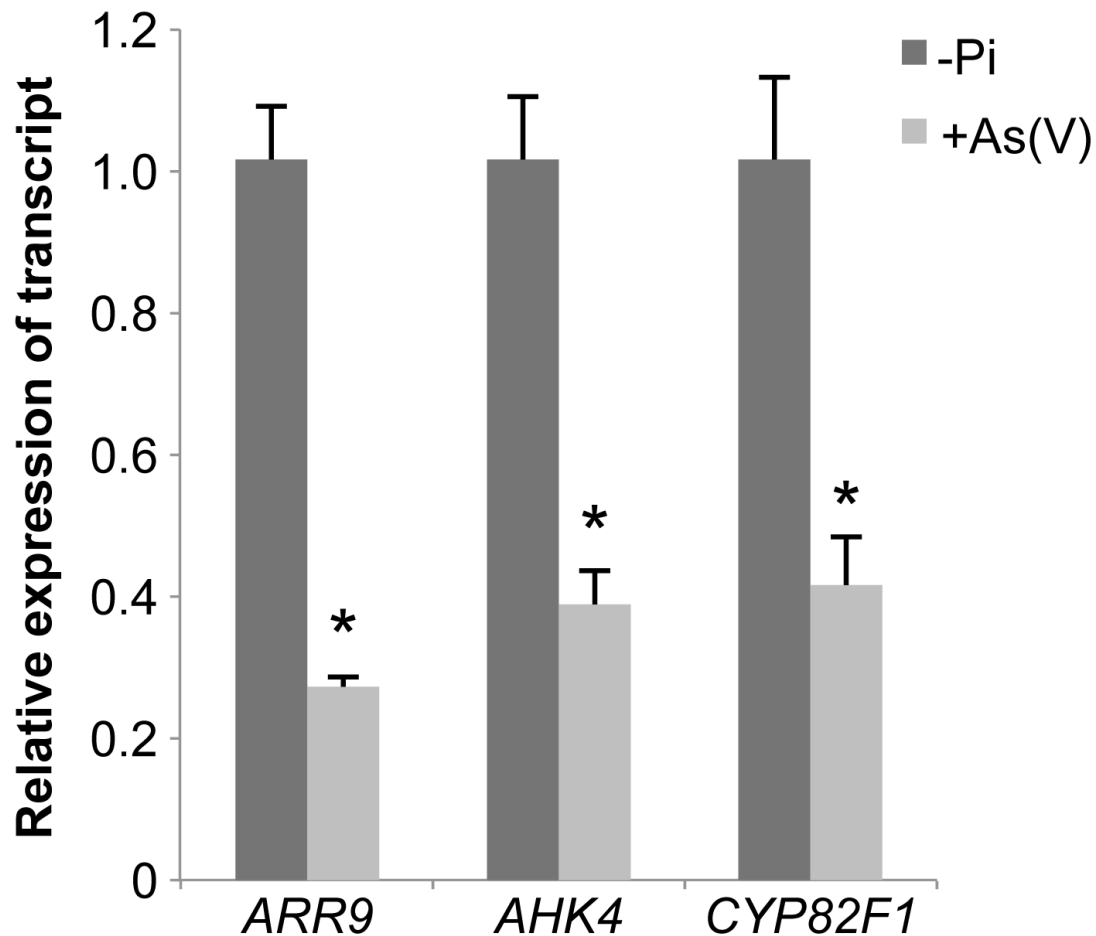

**Supplemental Figure S2.** CK responsive genes are downregulated in response to As(V). qRT-PCR expression analysis of *ARR9*, *AHK4* and *CYP82F1* in Col-0. Plants were grown in +Pi medium for 7 d, transferred to -Pi medium for 3 d and then to -Pi liquid medium alone (-Pi) or with 30  $\mu$ M As(V) [+As(V)] for 6 h. Expression was analyzed in whole seedlings. Bars show mean  $\pm$  SD ( $n = 3$ ). \* $p < 0.01$  (Student's *t*-test).
