# Supplementary material
Source: PubMed Central journal article supplement (PMC4902620)
Supplement: supp_pp.16.00372_PP2016-00372DR1_Figure_S3.pdf [file supp_pp.16.00372_PP2016-00372DR1_Figure_S3.pdf]

## Supplemental Figure S3

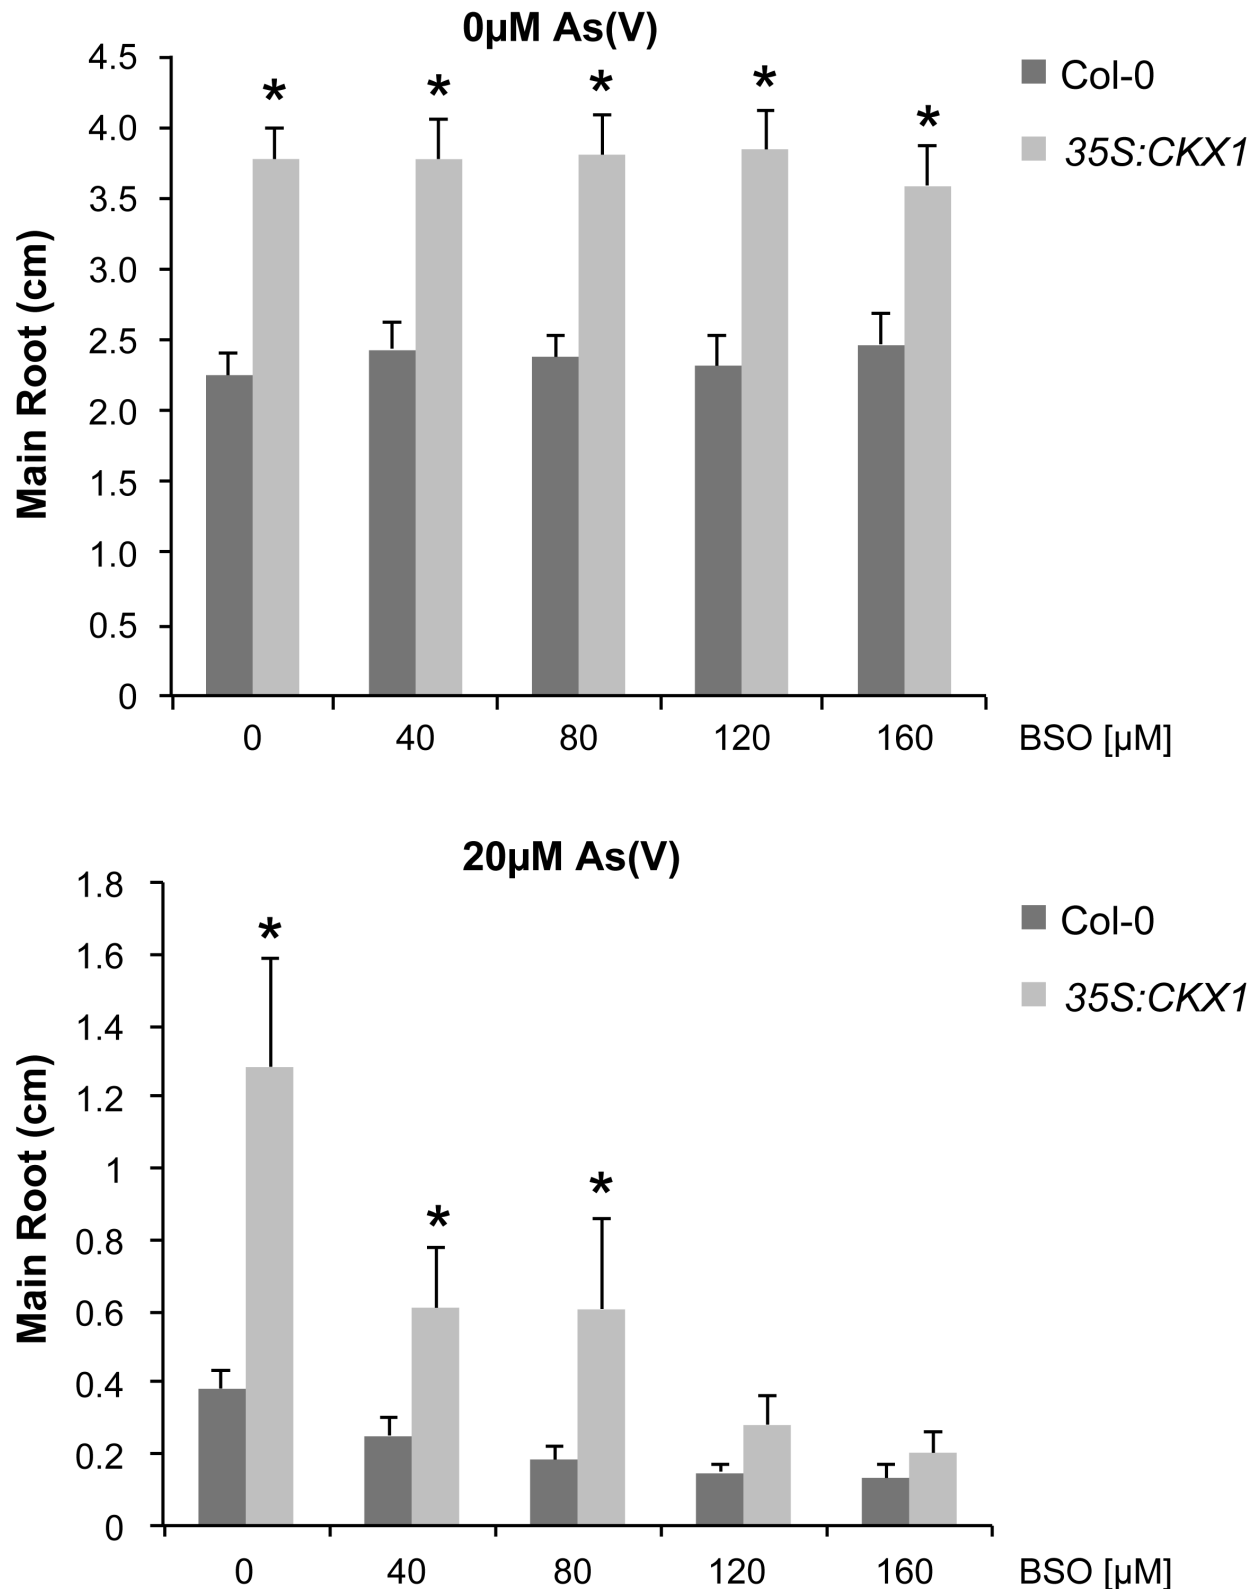

**Supplemental Figure S3.** As(V) sensitivity to BSO increased preferentially in cytokinin-depleted plants. Plants were grown on Johnson medium with 12.5 μM Pi in a vertical position for 5 d and then transferred to the same medium with increasing concentrations of BSO alone (top) or with 20 μM As(V) (bottom). Increase in root length was measured in wild-type (Col-0) and 35S:CKX1-overexpressing plants 3 d after transfer. Bars show mean ± SD ( $n \geq 15$ ). \* $P < 0.01$  (Student's  $t$ -test).
