# Supplementary material
Source: PubMed Central journal article supplement (PMC4902620)
Supplement: supp_pp.16.00372_PP2016-00372DR1_Supplemental_Datatbls.pdf [file supp_pp.16.00372_PP2016-00372DR1_Supplemental_Datatbls.pdf]

1 **SUPPLEMENTAL DATA**

2 **Supplemental Table S1.** TOP65CytK genes that overlap with As(V)-downregulated genes.  
 3 The data are supplementary to those shown in Table 1.  
 4

| Downregulated after As(V) -1.5 h |                                                        | Downregulated after As(V) -8 h |                                                                      |
|----------------------------------|--------------------------------------------------------|--------------------------------|----------------------------------------------------------------------|
| AGI                              | Protein encoded                                        | AGI                            | Protein encoded                                                      |
| At1g31320                        | LOB domain-containing protein 4                        | At1g04250                      | AUX/IAA transcriptional regulator family protein                     |
| At1g59940                        | response regulator 3                                   | At1g10470                      | response regulator 4                                                 |
| At2g01830                        | CHASE domain containing histidine kinase protein       | At1g13420                      | sulfotransferase 4B                                                  |
| At2g25160                        | cytochrome P450, family 82, subfamily F, polypeptide 1 | At1g16530                      | ASYMMETRIC LEAVES 2-like 9                                           |
| At2g34610                        | unknown                                                | At1g17190                      | glutathione S-transferase tau 26                                     |
| At2g40670                        | response regulator 16                                  | At1g19050                      | response regulator 7                                                 |
| At3g44990                        | xyloglucan endo-transglycosylase-related 8             | At1g31320                      | LOB domain-containing protein 4                                      |
| At3g45700                        | Major facilitator superfamily protein                  | At1g59940                      | response regulator 3                                                 |
| At3g50300                        | HXXXD-type acyl-transferase family protein             | At1g69040                      | ACT domain repeat 4                                                  |
| At3g57010                        | Calcium-dependent phosphotriesterase superfamily       | At1g69530                      | expansin A1                                                          |
| At3g57040                        | response regulator 9                                   | At1g72140                      | Major facilitator superfamily protein                                |
| At5g47950                        | HXXXD-type acyl-transferase family protein             | At2g01830                      | CHASE domain containing histidine kinase protein                     |
| At5g60890                        | myb domain protein 34                                  | At2g01890                      | purple acid phosphatase 8                                            |
| At5g62920                        | response regulator 6                                   | At2g25160                      | cytochrome P450, family 82, subfamily F, polypeptide 1               |
|                                  |                                                        | At3g29250                      | NAD(P)-binding Rossmann-fold superfamily protein                     |
|                                  |                                                        | At3g44990                      | xyloglucan endo-transglycosylase-related 8                           |
|                                  |                                                        | At3g50300                      | HXXXD-type acyl-transferase family protein                           |
|                                  |                                                        | At3g57010                      | Calcium-dependent phosphotriesterase superfamily protein             |
|                                  |                                                        | At3g57040                      | response regulator 9                                                 |
|                                  |                                                        | At4g11190                      | Disease resistance-responsive (dirigent-like protein) family protein |
|                                  |                                                        | At4g19030                      | NOD26-like major intrinsic protein 1                                 |
|                                  |                                                        | At4g23750                      | cytokinin response factor 2                                          |
|                                  |                                                        | At4g29690                      | Alkaline-phosphatase-like family protein                             |
|                                  |                                                        | At4g29700                      | Alkaline-phosphatase-like family protein                             |
|                                  |                                                        | At5g05860                      | UDP-glucosyl transferase 76C2                                        |
|                                  |                                                        | At5g26260                      | TRAF-like family protein                                             |
|                                  |                                                        | At5g47950                      | HXXXD-type acyl-transferase family protein                           |
|                                  |                                                        | At5g47980                      | HXXXD-type acyl-transferase family protein                           |
|                                  |                                                        | At5g47990                      | cytochrome P450, family 705, subfamily A, polypeptide 5              |
|                                  |                                                        | At5g48000                      | cytochrome P450, family 708, subfamily A, polypeptide 2              |
|                                  |                                                        | At5g48010                      | thalianol synthase 1                                                 |
|                                  |                                                        | At5g60890                      | myb domain protein 34                                                |

5  
6

7 **Supplemental Table S2.** Primers used for qRT-PCR analysis

| AGI       | Genes          | Forward                  | Reverse                   |
|-----------|----------------|--------------------------|---------------------------|
| AT1G18070 | <i>EF1a</i>    | cccaggctgattgtgctgt      | gggtggggcatccatcttgg      |
| AT5G43350 | <i>PHT1;1</i>  | cctcaactctccagagaagtctta | ttcgccatttcttagagc        |
| AT4G23100 | <i>γ-ECS</i>   | ttccctgtctccctgggtg      | tccaagtatcttcaaccgaac     |
| AT5G27380 | <i>GSH2</i>    | cccgagcatagcttaccatt     | gcaatgtcctcttgggtgctc     |
| AT5G44070 | <i>PCS1</i>    | tcgatctctggacgtaaattg    | ttcgagcaatccaacatt        |
| AT2G21045 | <i>AtARQ1</i>  | ttgatcgctggcttgaacg      | ttagccacatggctgaccc       |
| AT3G57040 | <i>ARR9</i>    | caaccgctgtctgatctacca    | tctgcattccctactgaaacca    |
| AT2G01830 | <i>AHK4</i>    | tacgctcaaaccgctcaagat    | tggtactgattccaactccagc    |
| AT2G25160 | <i>CYP82F1</i> | gtctatacccaccagtcctct    | tcttccatgcactcaccatcaa    |
| AT3G63110 | <i>IPT3</i>    | ccaagatggatgctaaccgtg    | cgacacagatctgtgcttgg      |
| AT5G19040 | <i>IPT5</i>    | agttacagcgatgaccacca     | ggcagagatctccggtagg       |
| AT3G23630 | <i>IPT7</i>    | actcctttgtctcaaacggtgc   | tgaacacttcttacttcttcgagt  |
| AT2G41510 | <i>CKX1</i>    | ctgagaagcggaaattctgaac   | gagtaccctgatccattaacca    |
| AT5G56970 | <i>CKX3</i>    | tctcaatacacagtcaacgagga  | tcgtacataaacctcttacatgg   |
| AT4G29740 | <i>CKX4</i>    | ccctccattattgaccag       | cgaaatagcgaacatctgtacg    |
| AT1G75450 | <i>CKX5</i>    | ccatggctctcaaatagtaacg   | tctgagcatctcatcacctctc    |
| AT5G21482 | <i>CKX7</i>    | caccagagctagggtttg       | catcgaactcgggtataactactct |

8

9 **Supplemental Figure S1.** Phenotypes of *ipt 3 5 7*, wild-type (Col-0), *cyp735a1 a2*,  
10 *35S:CKX1* and *ahk2 ahk3* plants grown on 12.5 μM Pi for 10 days.

11 **Supplemental Figure S2.** CK-responsive genes are downregulated in response to As(V).  
12 qRT-PCR expression analysis of *ARR9*, *AHK4* and *CYP82F1* in Col-0. Plants were grown in  
13 +Pi medium for 7 d, transferred to -Pi medium for 3 d and then to -Pi liquid medium alone  
14 (-Pi) or with 30 μM As(V) [+As(V)] for 6 h. Expression was analyzed in whole seedlings.  
15 Bars show mean ± SD (*n* = 3). \**P* < 0.01 (Student's *t*-test).

16 **Supplemental Figure S3.** As(V) sensitivity to BSO increased preferentially in cytokinin-  
17 depleted plants. Plants were grown on Johnson medium with 12.5 μM Pi in a vertical position  
18 for 5 d and then transferred to the same medium with increasing concentrations of BSO alone  
19 (top) or with 20 μM As(V) (bottom). Increase in root length was measured in wild-type  
20 (Col-0) and *35S:CKX1*-overexpressing plants 3 d after transfer. Bars show mean ± SD  
21 (*n* ≥ 15). \**P* < 0.01 (Student's *t*-test).
